# TFD: The transcription factors database

David Ghosh

National Center for Biotechnology Information, NLM, NIH, Bethesda, MD 20894, USA

Since its inception (1), a number of changes (2) have occurred to the Transcription Factors Database, some details of which will be described here. This database is designed to capture and contain information about the properties of transcription factors, their interrelationships, the nucleic acid and amino acid sequences that encode them, and the DNA sequences they recognize. This information has been sequestered into different tables so that, through the use of relational database management systems, the existence of relationships between the various entities represented in the database may be apprehended. Figure 1 presents an ERD (Entity-Relationship Diagram), and Figure 2 the corresponding data dictionary, for release 4.2 of this database, which became available in February 1992. Since release 1.0, five new tables (METHODS, N\_POINTERS, POLYPEPTIDES, REFERENCES, and X\_POINTERS) have been added, one table (ELEMENTS) has been removed, and the name of one table has been changed (from CDNAS to CLONES). The reference number (ref\_n) fields in the various tables have been maintained from the original database definition, but these fields now contain a Medline Unique Identifier (UID), avoiding the need for maintaining a local reference numbering scheme. In release 4.2, the database contains 1658, 929, 434, 1511, 1887, 34, 2552, 5726, and 4872 records in the CLONES, DOMAINS, FACTORS, POLYPEPTIDES, SITES, METHODS, N\_POINTERS, REFERENCES, and X\_POINTERS tables, respectively.

A question that arises frequently is 'How many transcription factors are there?' Though it is difficult to arrive at a single number that answers this question, the current numbers of entries in this database may provide some handle on this issue. Rat c-Jun, mouse c-Jun, and human c-Jun may be considered as three distinct transcription factors, although in a particular cell line or tissue source, only one of these proteins would be expressed. Furthermore, since Jun only has function within the context of the loosely defined entity termed AP-1, c-Jun could be considered, rather, as a subunit of a transcription factor. A central issue in answering the question of 'How many transcription factors' is whether one defines a transcription factor as an activity or as a molecule, but one answer to this question can be found in the entries of the TFD POLYPEPTIDES table, which currently corresponds to 1447 distinct polypeptide species.

A number of commercial and noncommercial tools now exist for using the sequence information contained in these tables (3). A slightly different class of tools has also been under development. These tools are designed to provide a groundwork for the use of 'visual reasoning' in studying relationships between objects having precomputed positions on large genomes, and are designed to provide graphic workbenches for the study of genome sequences, such as that of the organism *E. coli* (4). The use of the TFD SITES table for this category of analysis (5) may be of some value for the study of the long continuous and contiguous

sequences that are now being produced by genome sequencing efforts (6).

Figure 3 presents sample entries in a number of TFD tables. In a typical SITES entry (3A), there exist a number of fields (trn\_unit, locat\_ref, and n\_prob) which did not exist in the 1.0 release. The locat\_ref field now serves to distinguish locations that are defined relative to an mRNA start site from those that are defined relative to other numbering schemes such as arbitrary fragment or full genome coordinates. The n\_prob field contains a precomputed value that estimates the probability that the SITES entry will occur by chance in a random sequence of identical length, and the values in this field can be used in different ways. For example, sequence analysis datasets are now generated whose contents are restricted to SITES entries whose n\_prob values fall below a certain threshold. The n\_prob field can also be used, subsequent to a sequence analysis, to compute the statistical significance of a match to a specific SITES entry. In a DOMAINS entry (3B), a distinction now exists between the structural and functional classifications of the respective entries, which are represented by the struc\_clas and func\_clas fields. In release 4.2, the DOMAINS table contains 412 zinc finger entries, 299 homeodomain entries, 85 helix-turn-helix entries, and 133 entries of other classes.

A principal difference between the 4.2 release and the 1.0 release is in the existence of pointers tables. These tables (N\_POINTERS and X\_POINTERS) might also be considered

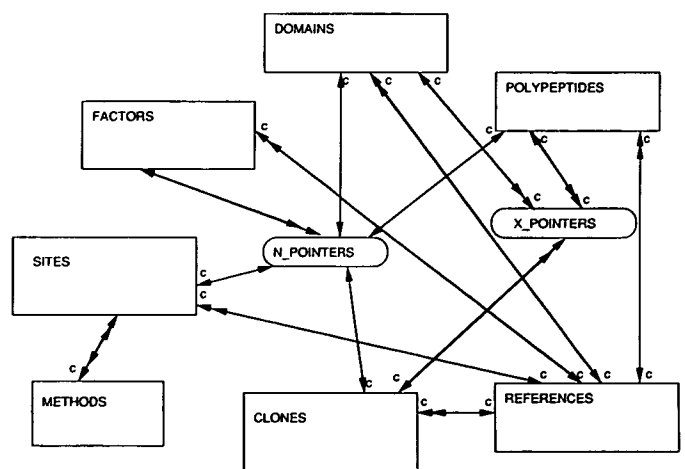

**Figure 1;** Entity-relationship diagram for eight tables in the 4.0 TFD release. one-to-one relationships are represented by links with single arrows at both ends. Instances of one-to-many relationships are indicated in the cases where one end of the link contains a double arrow. Conditional relationships are indicated by a 'c' character.

| Table   | Field      | Length | Description                                                                  | Table        | Field      | Length | Description                                                   |
|---------|------------|--------|------------------------------------------------------------------------------|--------------|------------|--------|---------------------------------------------------------------|
| clones  | clone_id   | 6      | Clones entry identifier                                                      | n_pointers   | table1     | 15     | name of first TFD table for this pointer                      |
| clones  | fac_name   | 20     | Name of factor                                                               | n_pointers   | id_1       | 7      | identifier for TFD entry 1                                    |
| clones  | clone_type | 7      | Type of clone (cdna or genomic)                                              | n_pointers   | table2     | 15     | name of second TFD table for this pointer                     |
| clones  | source     | 10     | Source of clone                                                              | n_pointers   | id_2       | 7      | identifier for TFD entry 2                                    |
| clones  | clone_name | 10     | Name of plasmid                                                              | polypeptides | polypep_id | 6      | Polypeptides entry identifier                                 |
| clones  | na_seq1    | 200    | Base pairs 1-200                                                             | polypeptides | fac_name   | 20     | Name given to factor                                          |
| clones  | na_seq2    | 200    | Base pairs 201-400                                                           | polypeptides | subunit    | 10     | Name of this subunit                                          |
| clones  | na_seq3    | 200    | Base pairs 401-600                                                           | polypeptides | organism   | 20     | Species name corresponding to biological source               |
| clones  | na_seq4    | 200    | Base pairs 601-800                                                           | polypeptides | aa_seq1    | 200    | Residues 1-200                                                |
| clones  | na_seq5    | 200    | Base pairs 801-1000                                                          | polypeptides | aa_seq2    | 200    | Residues 201-400                                              |
| clones  | segment    | 2      | segment identifier                                                           | polypeptides | aa_seq3    | 200    | Residues 401-600                                              |
| clones  | comments   | 80     | Comments                                                                     | polypeptides | aa_seq4    | 200    | Residues 601-800                                              |
| clones  | main_ref   | 60     | Literature reference                                                         | polypeptides | aa_seq5    | 200    | Residues 801-1000                                             |
| clones  | ref_n      | 8      | Reference number (medline uid)                                               | polypeptides | segment    | 2      | Which 1000 residue entry of complete sequence                 |
| domains | domain_id  | 6      | Domains entry identifier                                                     | polypeptides | seq_extnt  | 10     | Partial or complete ?                                         |
| domains | fac_name   | 20     | Name of factor                                                               | polypeptides | comments   | 80     | Comments                                                      |
| domains | struc_clas | 20     | Structural or motif classification                                           | polypeptides | main_ref   | 60     | Reference                                                     |
| domains | domain_num | 2      | Number of domain relative to amino terminus                                  | polypeptides | ref_n      | 8      | A reference number                                            |
| domains | seq_type   | 1      | Individual or consensus sequence                                             | references   | title      | 200    | Title of publication                                          |
| domains | aa_start   | 4      | Start position in protein                                                    | references   | author     | 200    | Authors of publication                                        |
| domains | aa_end     | 4      | Stop position                                                                | references   | journal    | 100    | Citation entry corresponding to publication                   |
| domains | aa_seq     | 150    | Amino acid sequence entry (one-letter code)                                  | references   | abstract   | 200    | First 200 characters of abstract                              |
| domains | func_clas  | 15     | Functional classification                                                    | references   | uid        | 8      | Eight-digit NLM unique identifier                             |
| domains | comments   | 80     | Comments                                                                     | sites        | site_id    | 6      | Sites entry identifier                                        |
| domains | main_ref   | 60     | Primary reference                                                            | sites        | fac_name   | 25     | Name of factor                                                |
| domains | ref_n      | 8      | A reference number                                                           | sites        | seq_name   | 30     | Name of sequence or element                                   |
| domains | organism   | 20     | Organism source                                                              | sites        | na_seq     | 45     | Nucleic acid sequence                                         |
| factors | factor_id  | 6      | Factors entry identifier                                                     | sites        | seq_type   | 1      | Individual or consensus sequence                              |
| factors | fac_name   | 20     | Name of factor                                                               | sites        | system     | 10     | System or organism                                            |
| factors | distrib    | 5      | Tissue distribution of factor                                                | sites        | genome     | 1      | Viral or cellular genome                                      |
| factors | system     | 5      | System or organism                                                           | sites        | trn_unit   | 20     | Name of transcription unit                                    |
| factors | clone      | 1      | Existing genomic or cdna?                                                    | sites        | comments   | 50     | Comments                                                      |
| factors | seq_spec   | 1      | Sequence-specific?                                                           | sites        | main_ref   | 70     | Primary reference                                             |
| factors | dna_bindin | 1      | DNA-binding?                                                                 | sites        | fac_source | 16     | Source of factor used to map site                             |
| factors | modifs     | 15     | Modifications                                                                | sites        | locat_ref  | 20     | Reference point for coordinates in "location"                 |
| factors | function   | 25     | Function                                                                     | sites        | location   | 20     | Location relative to mRNA start                               |
| factors | comments   | 80     | Comments                                                                     | sites        | method     | 11     | Method used to map site                                       |
| factors | main_ref   | 60     | Primary reference                                                            | sites        | n_prob     | 8      | Precomputed probability of site occurrence                    |
| factors | source     | 21     | Source for isolation of factor                                               | sites        | ref_n      | 8      | A reference number                                            |
| factors | mw         | 6      | Molecular weight of protein                                                  | sites        | strand     | 1      | Coding or noncoding                                           |
| factors | syns       | 16     | Synonymous or related factors                                                | sites        | binding    | 1      | Binding or non-binding                                        |
| factors | ref_n      | 8      | A reference number                                                           | x_pointers   | tfd_table  | 15     | Name of TFD table referenced by this pointer                  |
| factors | derivation | 15     | Description of how identity of the factor as a biochemical entity is derived | x_pointers   | tfd_id     | 6      | Identifier of the TFD entry                                   |
| factors | organism   | 20     | Organism source of the factor                                                | x_pointers   | x_db       | 10     | External database identifier                                  |
| methods | full       | 50     | experimental method                                                          | x_pointers   | x_release  | 4      | Release of database referenced in "x_db"                      |
| methods | tfdcode    | 2      | two-letter code used by TFD                                                  | x_pointers   | x_ac       | 10     | Accession number of the X_db entry referenced by this pointer |
|         |            |        |                                                                              | x_pointers   | x_entry    | 10     | Entry name of the X_db entry referenced by this pointer       |

Figure 2. Data dictionary for TFD release 4.0, including (from left to right) table name, field name, length of field, brief field description.

```

A  SITE_ID      S01874
   FAC_NAME    Kruppel
   SEQ_NAME    eve-stripe2-kr5
   NA_SEQ      TTAATCCGTT
   SEQ_TYPE    I
   SYSTEM      DROS
   GENOME      C
   TRN_UNIT    even-skipped
   MAIN_REF    Science 254: 1385-7 (1991)
   LOCAT_REF   RNA start site
   LOCATION    -1562/-1553
   METHOD       DF
   N_PROB      9.54e-07
   REF_N       92073911

```

the NCBI server. The internet address for downloading the files by anonymous FTP from the NCBI repository is 'ncbi.nlm.nih.gov' (numerical address 134.14.20.1); the files specific to TFD are located in the repository/TFD directory on this file server.

## ACKNOWLEDGEMENTS

I thank Tim Clark and Dennis Benson for their helpful comments on this manuscript. The mention of commercial organizations or products does not imply endorsement by the NCBI or the US Government.

## REFERENCES

1. Ghosh, D. (1990) *Nucleic Acids Res* **18**, 1749–1756.
2. Ghosh, D. (1991) *Trends Biochem Sci* **16**, 445–447.
3. These tools include, for SITES analysis, Dynamic, SignalScan (public domain software), and GCG, Ig/Suite, and IBI/Macvector (commercial products); for DOMAINS/POLYPEPTIDES analysis, the FASTA and BLAST families of programs.
4. Rudd, K.E., W. Miller, C. Werner, J. Ostell, C. Tolstoshov, and S.G. Satterfield (1991) *Nucleic Acids Res* **19**, 637–47.
5. Price, M., Hagstrom, R., and Overbeek, R. (1992), In preparation.
6. Pearson, R.L., B. Maidek, M. Chipperfield, R. Robbins (1991) *Science* **254**, 214–215.
7. Bucher, P. (1992) Eukaryotic Promoter Database of the Weizmann Institute of Science. This database is also available from the NCBI repository and from the EMBL file server.

```

B  DOMAIN_ID    D00293
   FAC_NAME    c-Myc
   STRUC_CLAS  helix-loop-helix
   DOMAIN_NUM  1
   SEQ_TYPE    I
   AA_START    346.00
   AA_END      405.00
   AA_SEQ      VKRRRTHNVLERQRRNELKRSFFALRDQIPELENNEKAPKVVILKATAYILSVQAEQKL

   FUNC_CLAS   dimerization
   COMMENTS    Myc similarity region

   MAIN_REF    Genes Dev 4: 167-79 (1990)
   REF_N       90249724

C  TFD_TABLE    polypeptides
   TFD_ID      P00221
   X_DB        PIR
   X_RELEASE   27.0
   X_AC        A28263
   X_ENTRY     TVRTFS

```

Figure 3. Sample TFD entries in the SITES (3A), DOMAINS (3B), and X\_\_POINTERS (3C) tables.

as 'relation matrices' or 'correlation tables', and can be used as hard links between any of a number of molecular biology databases (Genbank, EMBL, SwissProt, PIR, Genpept, NCBI-Backbone) and TFD. A TFD X\_\_POINTERS entry is presented (Figure 3C) which shows a typical cross-reference between TFD and an external database, which in this case is between a TFD POLYPEPTIDES entry (P00221, rat AP-1/c-Fos) and an entry in the NBRF-PIR database.

Though the ELEMENTS table is no longer contained in TFD, an initial set of cross-references between TFD SITES and EPD (reference 7, the Eukaryotic Promoter Database) has been produced. EPD is linked directly to the EMBL nucleotide sequence database, and it is possible, for those entries which correspond to naturally-occurring promoter sequences, to establish maps between TFD SITES entries and the general purpose nucleotide sequence databases such as Genbank and EMBL. Database retrieval tools that would access these links and cross-references are now under development.

The TFD database is available as a set of flat ASCII text files (each corresponding to a TFD table), or as a simple ASN.1 (Abstract Syntax Notation) file from the NCBI repository, or from the EMBL file server, as well as a number of different CD-ROMS. At NCBI the contents of these files have been loaded into a number of database managers, including Xbase (dBASE, Foxbase, dBXL, etc.), Paradox, Oracle, Sybase, and 4th Dimension, but in principle the flat text files may be imported into any standard relational database manager. SITES datasets as well as amino acid sequence (DOMAINS, POLYEPTIDES) datasets, intended for sequence analysis, are also available from
